# Supplementary material
Source: HighWire-hosted journal article supplement (https://svn.smart01.highwire.org/content/2/4/176)
Supplement: inline-supplementary-material-3 [file inline-supplementary-material-3.pdf]

Table S2. Factors associated with the open-label aspirin dose at day 1 according to the logistic regression analysis

| Factors                                     | Odds Ratio with 95% CI | P value |
|---------------------------------------------|------------------------|---------|
| Age                                         | 1.00 (0.99-1.01)       | 0.85    |
| Male vs. female                             | 0.95 (0.78-1.15)       | 0.59    |
| Medical history                             |                        |         |
| Previous TIA or stroke                      | 0.95 (0.79-1.14)       | 0.56    |
| Hypertension                                | 0.81 (0.69-0.96)       | 0.01    |
| Diabetes mellitus                           | 0.94 (0.78-1.14)       | 0.53    |
| Dyslipidemia                                | 0.91 (0.71-1.17)       | 0.48    |
| Myocardial infarction                       | 0.97 (0.68-1.39)       | 0.88    |
| Known atrial fibrillation                   | 1.12 (0.64-1.95)       | 0.69    |
| Current or previous smoking                 | 0.85 (0.70-1.04)       | 0.12    |
| High blood pressure at baseline             | 1.24 (1.03-1.49)       | 0.03    |
| BMI at admission                            | 0.98 (0.96-1.01)       | 0.20    |
| Time from onset to randomization < 12 hours | 0.92 (0.79-1.07)       | 0.26    |
| Qualifying event: Minor stroke vs. TIA      | 1.27 (1.07-1.51)       | 0.007   |

TIA denotes transient ischemic attack; BMI, body mass index; High blood pressure is defined as systolic blood pressure >140mmHg or diastolic blood pressure >90 mmHg.
